# Supplementary material for: The regional myocardial infarction registry of Saxony-Anhalt (RHESA) in Germany – rational and study protocol
Source: Springer Nature journal article supplement (doi:10.1186/s12872-015-0040-2), 2015-06-08
Supplement: MOESM1 [file 9736694]

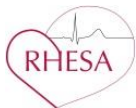

|                                                                                                                                                                                                                                                                                                                                                                                                                                                                                                                                                                                                                                                                                                                                                                                                                                                                                                                                                                                                                                                                                                                                                                                                                                                                                                                                                                                                                                                      |                                                                                                              |                                                                                                                                                                                                                                                                                                                                                                                                                                                                                                                                                                                                                                                                                                                                                                                                                                                                                                                                                                    |           |                         |
|------------------------------------------------------------------------------------------------------------------------------------------------------------------------------------------------------------------------------------------------------------------------------------------------------------------------------------------------------------------------------------------------------------------------------------------------------------------------------------------------------------------------------------------------------------------------------------------------------------------------------------------------------------------------------------------------------------------------------------------------------------------------------------------------------------------------------------------------------------------------------------------------------------------------------------------------------------------------------------------------------------------------------------------------------------------------------------------------------------------------------------------------------------------------------------------------------------------------------------------------------------------------------------------------------------------------------------------------------------------------------------------------------------------------------------------------------|--------------------------------------------------------------------------------------------------------------|--------------------------------------------------------------------------------------------------------------------------------------------------------------------------------------------------------------------------------------------------------------------------------------------------------------------------------------------------------------------------------------------------------------------------------------------------------------------------------------------------------------------------------------------------------------------------------------------------------------------------------------------------------------------------------------------------------------------------------------------------------------------------------------------------------------------------------------------------------------------------------------------------------------------------------------------------------------------|-----------|-------------------------|
| Martin-Luther-University Halle-Wittenberg<br>Medical Faculty<br><b>IMEBI</b><br>06097 Halle (Saale)                                                                                                                                                                                                                                                                                                                                                                                                                                                                                                                                                                                                                                                                                                                                                                                                                                                                                                                                                                                                                                                                                                                                                                                                                                                                                                                                                  | Tel.: 0345 557-3579<br>Fax: 0345 557-3565<br>rhesa@medizin.uni-halle.de<br>www.mezizin.uni-halle.de/rhesa/de | <b>Inclusion criteria</b><br>Confirmed diagnosis myocardial infarct (STEMI and NSTEMI)                                                                                                                                                                                                                                                                                                                                                                                                                                                                                                                                                                                                                                                                                                                                                                                                                                                                             | <b>A1</b> | <b>consent is given</b> |
| <b>1. Personal data</b><br>Name _____<br>First name _____<br>Birthdate <input type="text"/> / <input type="text"/> / <input type="text"/> <input type="checkbox"/> Man <input type="checkbox"/> Woman<br>Weight _____ kg      Height _____ cm<br>Postcode, place of residence _____<br>Name of family physician _____ health insurance _____<br>Assignment number from emergency protocol _____                                                                                                                                                                                                                                                                                                                                                                                                                                                                                                                                                                                                                                                                                                                                                                                                                                                                                                                                                                                                                                                      |                                                                                                              | <b>5. First therapy</b> (PCI see 5a)<br><input type="checkbox"/> ASS <input type="checkbox"/> Clopidogrel/Prasugrel/Ticagrelor <input type="checkbox"/> Heparin<br><input type="checkbox"/> GP IIb/IIIa-Antagonist<br>Thrombolytic therapy <input type="checkbox"/> ja <input type="text"/> / <input type="text"/> / <input type="text"/> <input type="checkbox"/> no <input type="checkbox"/> n. k.<br><small style="margin-left: 100px;">Day      Month      Year      Hour      Min.</small><br>If yes, which substance: _____ <input type="checkbox"/> n. k.<br>Bypass-OP <input type="checkbox"/> yes <input type="checkbox"/> no <input type="checkbox"/> n. k.<br>If yes, <input type="checkbox"/> elective or <input type="checkbox"/> Emergency-OP: <input type="text"/> / <input type="text"/> / <input type="text"/><br><small style="margin-left: 100px;">Day      Month      Year</small><br>Why neither thrombolytic therapy nor PCI nor CABG: _____ |           |                         |
| <b>2. First care</b><br>Symptom-onset <input type="text"/> / <input type="text"/> / <input type="text"/> <input type="text"/> / <input type="text"/> <input type="checkbox"/> n. k.<br><small style="margin-left: 100px;">Day      Month      Year      Hour      Min.</small><br>Hospital admission <input type="text"/> / <input type="text"/> / <input type="text"/> <input type="text"/> / <input type="text"/> <input type="checkbox"/> n. k.<br><small style="margin-left: 100px;">Day      Month      Year      Hour      Min.</small><br>Intrahospital <input type="checkbox"/> yes <input type="checkbox"/> no <input type="checkbox"/> n.k.<br>First treatment <input type="checkbox"/> NEF <input type="checkbox"/> RTW <input type="checkbox"/> RTH/ITH<br><input type="checkbox"/> KTW <input type="checkbox"/> KV-Dienst <input type="checkbox"/> alone <input type="checkbox"/> n.k.<br>First aid (lay) <input type="checkbox"/> yes <input type="checkbox"/> no <input type="checkbox"/> n.k.<br>Assignment <input type="checkbox"/> ja <input type="checkbox"/> nein <input type="checkbox"/> n.k.<br>If yes, from which: _____                                                                                                                                                                                                                                                                                                     |                                                                                                              | <b>5a. PCI</b><br>PCI <input type="checkbox"/> yes <input type="checkbox"/> no<br>If yes, access: <input type="checkbox"/> transradial <input type="checkbox"/> transfemoral<br>Stent <input type="checkbox"/> yes <input type="checkbox"/> no<br>If yes, <input type="checkbox"/> BMS <input type="checkbox"/> DES<br>Date PCI: <input type="text"/> / <input type="text"/> / <input type="text"/><br><small style="margin-left: 100px;">Day      Month      Year</small><br>Vessel puncture <input type="text"/> / <input type="text"/> <input type="text"/> / <input type="text"/> <input type="text"/> / <input type="text"/> <input type="text"/> / <input type="text"/><br><small style="margin-left: 100px;">Hour      Min.      Hour      Min.</small><br>TIMI (before) _____ TIMI (afterwards) _____<br>IABP <input type="checkbox"/> yes <input type="checkbox"/> no                                                                                     |           |                         |
| <b>3. Risk factors and comorbidities</b><br>Smoker <input type="checkbox"/> yes <input type="checkbox"/> formerly <input type="checkbox"/> no <input type="checkbox"/> n.k.<br>Diabetes mellitus <input type="checkbox"/> yes <input type="checkbox"/> new <input type="checkbox"/> no <input type="checkbox"/> n.k.<br>Hypertension <input type="checkbox"/> yes <input type="checkbox"/> no <input type="checkbox"/> n.k.<br>Hypercholesterolemia <input type="checkbox"/> yes <input type="checkbox"/> no <input type="checkbox"/> n.k.<br>Post-myocardial infarction status <input type="checkbox"/> yes <input type="checkbox"/> no <input type="checkbox"/> n.k.<br>Post-PCI status <input type="checkbox"/> yes <input type="checkbox"/> no <input type="checkbox"/> n.k.<br>Post-Bypass-OP status <input type="checkbox"/> yes <input type="checkbox"/> no <input type="checkbox"/> n.k.<br>Post-Apoplexy status <input type="checkbox"/> yes <input type="checkbox"/> no <input type="checkbox"/> n.k.<br>Atrial fibrillation/flutter <input type="checkbox"/> yes <input type="checkbox"/> no <input type="checkbox"/> n.k.<br>Heart failure <input type="checkbox"/> yes <input type="checkbox"/> no <input type="checkbox"/> n.k.<br>Renal failure <input type="checkbox"/> yes <input type="checkbox"/> no <input type="checkbox"/> n.k.<br>pAVK <input type="checkbox"/> yes <input type="checkbox"/> no <input type="checkbox"/> n.k. |                                                                                                              | <b>6. Stationary complications</b><br><input type="checkbox"/> none<br><input type="checkbox"/> Shock (new) <input type="checkbox"/> Intubation <input type="checkbox"/> Resuscitation<br><input type="checkbox"/> Re-infarct <input type="checkbox"/> Stroke <input type="checkbox"/> Re-intervention<br><input type="checkbox"/> Severe bleeding<br><input type="checkbox"/> Other: _____                                                                                                                                                                                                                                                                                                                                                                                                                                                                                                                                                                        |           |                         |
| <b>4. Acute diagnostic investigations</b><br>On admission HF <input type="text"/> /Min.<br>RR <input type="text"/> / <input type="text"/> mmHg<br>Cardiogenic shock on admission:<br><input type="checkbox"/> yes <input type="checkbox"/> no <input type="checkbox"/> n.k.<br>First EKG <input type="checkbox"/> STEMI <input type="checkbox"/> NSTEMI <input type="checkbox"/> new LSB<br><input type="checkbox"/> Troponin I <input type="checkbox"/> Troponin T Value _____ Threshold value _____<br><input type="checkbox"/> Type 1 <input type="checkbox"/> Type 2 <input type="checkbox"/> Type3 <input type="checkbox"/> Type4a <input type="checkbox"/> Type4b <input type="checkbox"/> Type5 <input type="checkbox"/> n.k.<br>First attending station:<br><input type="checkbox"/> ITS <input type="checkbox"/> IMC/CPU<br><input type="checkbox"/> Station with monitoring system <input type="checkbox"/> Normalstation                                                                                                                                                                                                                                                                                                                                                                                                                                                                                                                  |                                                                                                              | <b>7. Medications at discharge</b><br><input type="checkbox"/> ASS <input type="checkbox"/> Beta blocker <input type="checkbox"/> ACE/ARB-Hemmer<br><input type="checkbox"/> Clopidogrel/Prasugrel/Ticagrelor<br><input type="checkbox"/> Diuretic <input type="checkbox"/> Anticoagulant <input type="checkbox"/> Aldosteronantagonist<br><input type="checkbox"/> Statine <input type="checkbox"/> other Cholesterol lowering drug<br><input type="checkbox"/> Insulin <input type="checkbox"/> oral Antidiabetic drug<br><input type="checkbox"/> Other: _____                                                                                                                                                                                                                                                                                                                                                                                                  |           |                         |
| <b>8. Discharge, Transfer, Death</b><br><input type="checkbox"/> Patient discharged Date: <input type="text"/> / <input type="text"/> / <input type="text"/><br><small style="margin-left: 100px;">Day      Month      Year</small><br><input type="checkbox"/> Patient transferred Date: <input type="text"/> / <input type="text"/> / <input type="text"/> <input type="text"/> / <input type="text"/> <input type="text"/><br><small style="margin-left: 100px;">Day      Month      Year      Hour      Min.</small><br>If Patient transferred, transfer to:<br><input type="checkbox"/> Bad Bevensen <input type="checkbox"/> Magdeburg <input type="checkbox"/> Perleberg<br><input type="checkbox"/> Stendal <input type="checkbox"/> Uelzen <input type="checkbox"/> Wittstock<br><input type="checkbox"/> Other: _____<br><input type="checkbox"/> Patient died Date: <input type="text"/> / <input type="text"/> / <input type="text"/> <input type="text"/> / <input type="text"/> <input type="text"/><br><small style="margin-left: 100px;">Day      Month      Year      Hour      Min.</small>                                                                                                                                                                                                                                                                                                                                        |                                                                                                              | Questionnaire filled: <input type="text"/> / <input type="text"/> / <input type="text"/><br><small style="margin-left: 100px;">Day      Month      Year</small><br>Name of the Physician (block capital) _____<br>Signature of the physician _____                                                                                                                                                                                                                                                                                                                                                                                                                                                                                                                                                                                                                                                                                                                 |           |                         |
